# Supplementary material for: Pdxdc1 modulates prepulse inhibition of acoustic startle in the mouse
Source: PubMed Central journal article supplement — Transl Psychiatry. 2017 May 9;7(5):e1125–. doi: 10.1038/tp.2017.85 (PMC5534953; doi:10.1038/tp.2017.85), 2017-05-09
Supplement: tp201785x2.pdf [file tp201785x2.pdf]

A

| ProbeSet     | Gene Symbol                           | Score | logFC    |          |          | AveExpr |      |      |
|--------------|---------------------------------------|-------|----------|----------|----------|---------|------|------|
|              |                                       |       | Hi       | St       | Bs       | Hi      | St   | Bs   |
| 1454817_at   | Utp18                                 | 15.1  | 4.1E-02  | 4.9E-02  | 3.8E-02  | 8.8     | 8.5  | 8.2  |
| 1417024_at   | Hars                                  | 14.2  | 2.9E-02  | 3.5E-02  | 2.7E-02  | 10.6    | 10.5 | 10.7 |
| 1452677_at   | LOC100044383 /// Pnpt1                | 13.2  | 2.0E-01  | 1.5E-01  | 1.4E-01  | 4.0     | 3.7  | 4.0  |
| 1418072_at   | Hist1h2bc /// Hist2h2bb               | 13.2  | -2.8E-02 | -4.0E-02 | -1.8E-02 | 12.5    | 12.8 | 13.0 |
| 1450900_at   | Smek2                                 | 13.0  | 5.3E-02  | 4.7E-02  | 3.4E-02  | 10.2    | 10.1 | 10.1 |
| 1449401_at   | C1qc                                  | 12.8  | -7.4E-02 | -6.9E-02 | -6.1E-02 | 8.6     | 9.3  | 8.3  |
| 1439968_x_at | Dbndd2                                | 12.2  | -5.9E-02 | -7.9E-02 | -7.2E-02 | 8.3     | 8.4  | 9.1  |
| 1452540_a_at | bm /// Hist1h2bp /// Hist2h2bb /// LC | 12.2  | -3.7E-02 | -3.7E-02 | -1.6E-02 | 11.5    | 11.7 | 12.0 |
| 1430577_at   | Cep27                                 | 12.2  | -4.1E-02 | -3.9E-02 | -3.0E-02 | 8.0     | 7.2  | 8.3  |
| 1439032_at   | Cep27                                 | 12.0  | -4.2E-02 | -5.2E-02 | -2.9E-02 | 9.3     | 8.7  | 9.1  |
| 1429862_at   | Pla2g4e                               | 12.0  | 6.6E-02  | 9.9E-02  | 9.0E-02  | 6.0     | 3.7  | 4.9  |
| 1419903_at   | Dbndd2                                | 11.9  | -5.4E-02 | -6.7E-02 | -5.8E-02 | 8.0     | 8.8  | 9.4  |
| 1455095_at   | Hist2h2be                             | 11.8  | -3.7E-02 | -4.2E-02 | -2.0E-02 | 7.2     | 6.5  | 6.9  |
| 1446147_at   | Rbm39                                 | 11.8  | 6.3E-02  | 7.0E-02  | 6.1E-02  | 10.8    | 10.9 | 10.1 |
| 1440771_at   | Zkscan1                               | 11.6  | 9.6E-02  | 1.1E-01  | 8.2E-02  | 7.8     | 8.4  | 6.4  |
| 1436372_a_at | Pdxdc1                                | 11.6  | -4.5E-02 | -7.6E-02 | -4.8E-02 | 8.4     | 8.2  | 8.9  |
| 1446148_x_at | Rbm39                                 | 11.5  | 6.1E-02  | 6.9E-02  | 5.6E-02  | 10.4    | 10.4 | 9.9  |
| 1439650_at   | Rtn4                                  | 11.5  | -8.9E-02 | -5.6E-02 | -5.9E-02 | 8.3     | 8.6  | 8.9  |
| 1420941_at   | Rgs5                                  | 11.4  | 2.9E-02  | 4.3E-02  | 2.0E-02  | 10.1    | 10.6 | 10.8 |
| 1437308_s_at | F2r                                   | 11.4  | 6.3E-02  | 1.5E-01  | 3.0E-02  | 7.6     | 6.6  | 9.7  |
| 1440557_at   | lpr                                   | 11.4  | -1.4E-01 | -1.4E-01 | -1.3E-01 | 6.5     | 7.1  | 8.0  |
| 1446265_at   | Dnm3                                  | 11.3  | -1.0E-01 | -6.7E-02 | -4.4E-02 | 9.2     | 10.1 | 11.2 |
| 1456351_at   | Brd8                                  | 11.3  | 3.8E-02  | 5.6E-02  | 3.3E-02  | 8.4     | 8.2  | 7.7  |
| 1455131_at   | Opa3                                  | 11.3  | 3.0E-02  | 2.0E-02  | 1.9E-02  | 9.3     | 8.9  | 9.4  |
| 1421901_at   | Eif2ak1                               | 11.3  | -2.0E-02 | -2.6E-02 | -1.8E-02 | 9.4     | 9.2  | 9.8  |
| 1434208_at   | Rnf169                                | 11.3  | -1.1E-01 | -7.6E-02 | -2.2E-02 | 7.7     | 8.3  | 5.7  |
| 1423462_at   | Map3k7ip2                             | 11.2  | 1.2E-02  | 1.5E-02  | 1.1E-02  | 11.6    | 11.6 | 11.4 |
| 1431042_at   | Paqr8                                 | 11.2  | -4.2E-02 | -5.2E-02 | -4.0E-02 | 8.9     | 8.4  | 9.6  |
| 1456943_a_at | Dbndd2                                | 11.2  | -4.8E-02 | -5.2E-02 | -5.4E-02 | 8.6     | 8.9  | 9.7  |
| 1433462_a_at | Pi4k2a                                | 11.2  | -9.5E-02 | -8.9E-02 | -5.3E-02 | 8.6     | 8.3  | 9.0  |
| 1417714_x_at | Hba-a1 /// Hba-a2                     | 11.1  | 8.6E-02  | 1.0E-01  | 6.4E-02  | 9.3     | 8.9  | 11.2 |
| 1423495_at   | Decr2                                 | 11.0  | 7.2E-02  | 1.1E-01  | 5.5E-02  | 9.1     | 7.6  | 8.5  |
| 1428692_at   | Hddc3                                 | 10.8  | 9.3E-02  | 9.0E-02  | 8.2E-02  | 7.8     | 8.2  | 8.6  |
| 1435203_at   | Man2a2                                | 10.8  | 1.2E-02  | 1.7E-02  | 2.3E-02  | 10.9    | 11.4 | 10.6 |
| 1427207_s_at | Afg3l2 /// LOC100048880               | 10.8  | 9.7E-03  | 1.7E-02  | 1.2E-02  | 10.0    | 9.8  | 10.4 |
| 1430375_a_at | 100039863 /// LOC100039939 /// LC     | 10.7  | -7.6E-02 | -6.9E-02 | -5.0E-02 | 10.3    | 10.6 | 9.5  |
| 1452705_at   | Pdxdc1                                | 10.7  | -2.6E-01 | -2.6E-01 | -2.1E-01 | 7.6     | 7.4  | 7.9  |

B

| Transcript       | ProbeSet     | Brainstem    |        |                 |        | Hippocampus  |         |                 |          | Striatum     |              |                 |        |         |        |
|------------------|--------------|--------------|--------|-----------------|--------|--------------|---------|-----------------|----------|--------------|--------------|-----------------|--------|---------|--------|
|                  |              | Array vs PCR |        | Behavior vs PCR |        | Array vs PCR |         | Behavior vs PCR |          | Array vs PCR |              | Behavior vs PCR |        |         |        |
|                  |              | Rho          | P      | Rho             | P      | Rho          | P       | Rho             | P        | Rho          | P            | Rho             | P      |         |        |
| <i>Dnm3</i>      | 1446265_at   | 0.2508       | 0.3155 | 0.1429          | 0.8028 | 1446265_at   | -0.2322 | 0.3538          | -0.08571 | 0.9194       | 1446265_at   | -0.1352         | 0.5927 | 0.02857 | 1      |
|                  | 1425403_at   | 0.3602       | 0.1421 |                 |        | 1425403_at   | -0.1187 | 0.639           |          |              | 1425403_at   | 0.007224        | 0.9773 |         |        |
|                  | 1438801_at   | 0.3395       | 0.1681 |                 |        | 1438801_at   | -0.3106 | 0.2096          |          |              | 1438801_at   | -0.03818        | 0.8804 |         |        |
| <i>Pdxdc1</i>    | 1436372_a_at | 0.7441       | 0.0004 | -0.6            | 0.2417 | 1436372_a_at | 0.6739  | 0.0022          | -0.8857  | 0.0333       | 1436372_a_at | 0.42            | 0.0827 | -0.2571 | 0.6583 |
|                  | 1452705_at   | 0.5129       | 0.0034 |                 |        | 1452705_at   | 0.5273  | 0.0245          |          |              | 1452705_at   | 0.451           | 0.0603 |         |        |
|                  | 1419327_at   | -0.5397      | 0.003  |                 |        | 1419327_at   | -0.6883 | 0.0016          |          |              | 1419327_at   | -0.4778         | 0.0449 |         |        |
| <i>Dbndd2</i>    | 1428200_a_at | 0.5191       | 0.0303 |                 |        | 1428200_a_at | 0.6471  | 0.0037          |          |              | 1428200_a_at | 0.3189          | 0.1971 |         |        |
|                  | 1456943_a_at | 0.7069       | 0.001  | -0.8286         | 0.0583 | 1456943_a_at | 0.2157  | 0.39            | -0.2     | 0.7139       | 1456943_a_at | 0.6904          | 0.0015 | 0.4286  | 0.4194 |
|                  | 1419903_at   | 0.6533       | 0.0033 |                 |        | 1419903_at   | 0.2136  | 0.3947          |          |              | 1419903_at   | 0.5748          | 0.0126 |         |        |
| <i>Hist1h2bc</i> | 1439968_x_at | 0.6594       | 0.0029 |                 |        | 1439968_x_at | 0.2693  | 0.2798          |          |              | 1439968_x_at | 0.6161          | 0.0065 |         |        |
|                  | 1418072_at   | 0.5521       | 0.0175 | -0.8857         | 0.0333 | 1418072_at   | 0.709   | 0.001           | -0.8857  | 0.0333       | 1418072_at   | 0.5273          | 0.0245 | -0.1429 | 0.8028 |
|                  | 1420941_at   | 0.2652       | 0.2875 | -0.1429         | 0.8028 | 1420941_at   | 0.6739  | 0.0022          | 0.3714   | 0.4972       | 1420941_at   | 0.2074          | 0.4089 | 0.5429  | 0.2972 |
| <i>Rgs5</i>      | 1420940_x_at | 0.3065       | 0.2161 |                 |        | 1420940_x_at | 0.07946 | 0.754           |          |              | 1420940_x_at | -0.1496         | 0.5534 |         |        |
|                  | 1420942_s_at | 0.1992       | 0.4282 |                 |        | 1420942_s_at | 0.0547  | 0.8293          |          |              | 1420942_s_at | -0.42           | 0.0827 |         |        |
|                  | 1417466_at   | 0.2549       | 0.3073 |                 |        | 1417466_at   | -0.1538 | 0.5424          |          |              | 1417466_at   | -0.4076         | 0.0931 |         |        |

**Figure S1. Gene expression array selected results and real-time RT-PCR confirmation of expression.**

**A) Gene list from microarray analysis.** This table lists some of the probe sets with the highest significance scores, linear modelling q-values, fold change differences and average expression levels. Genes highlighted in green are those selected for further study. Log fold change is shown for each brain region (logFC), the calculated score (Score), and average expression levels (AveExpr) for each brain region are shown.

**B) Real-time RT-PCR gene expression data vs. microarray expression and PPIc for five genes.** Probe sets that were validated with real-time RT-PCR data include *Pdxdc1* (in all three tissues), *Dbndd2* (in two tissues), *Hist1h2bc* (in all three tissues), and *Rgs5* in striatum. Real-time RT-PCR results confirmed array results for behaviour for *Dbndd2* in brainstem, *Hist1h2bc* in brainstem and hippocampus, and for *Pdxdc1* in hippocampus.
