# Supplementary material for: Pdxdc1 modulates prepulse inhibition of acoustic startle in the mouse
Source: PubMed Central journal article supplement — Transl Psychiatry. 2017 May 9;7(5):e1125–. doi: 10.1038/tp.2017.85 (PMC5534953; doi:10.1038/tp.2017.85), 2017-05-09
Supplement: tp201785x3.pdf [file tp201785x3.pdf]

**A**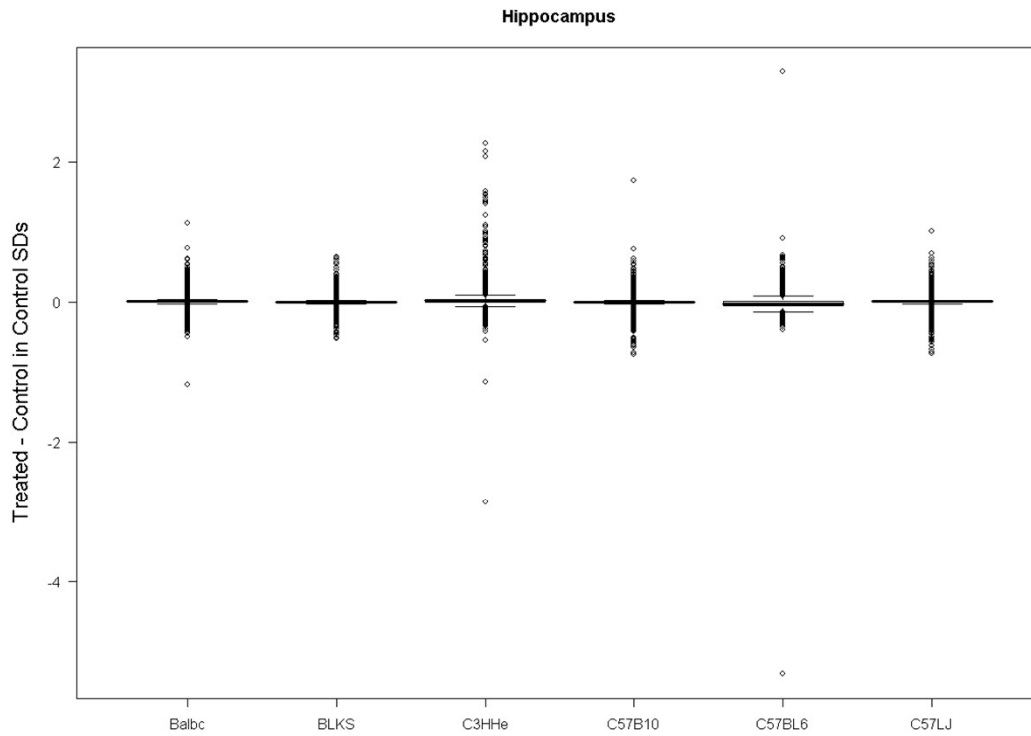**B**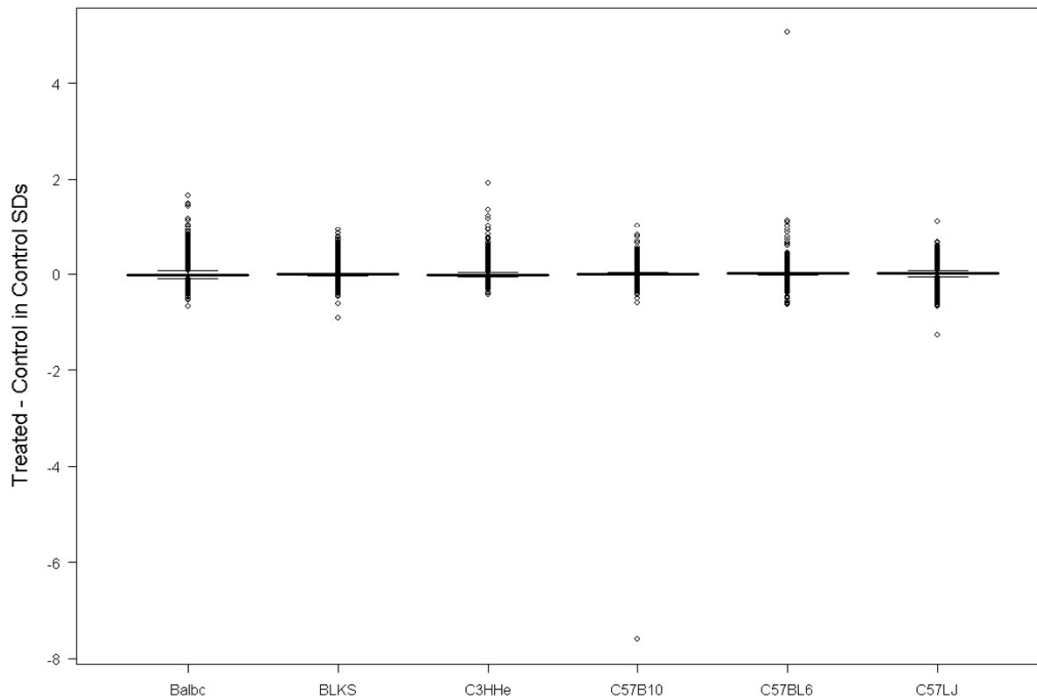**Figure S2. Treatment-induced changes in gene expression.**

Gene expression experiment results were analyzed for each gene, where tested animal variability was calculated in standard deviations and tested against the standard deviations of control animals. This provided a list of ~50k genes with a number of standard deviations that separated control from tested animals, which are shown by tissue in (A) hippocampus and (B) striatum. Similar results were seen in brainstem (data not shown). The differences were no more than two standard deviations and typically much smaller, suggesting that if treatment induced gene expression does occur it is no larger than the natural variability between control mice.
