# Supplementary material for: Pdxdc1 modulates prepulse inhibition of acoustic startle in the mouse
Source: PubMed Central journal article supplement — Transl Psychiatry. 2017 May 9;7(5):e1125–. doi: 10.1038/tp.2017.85 (PMC5534953; doi:10.1038/tp.2017.85), 2017-05-09
Supplement: tp201785x4.pdf [file tp201785x4.pdf]

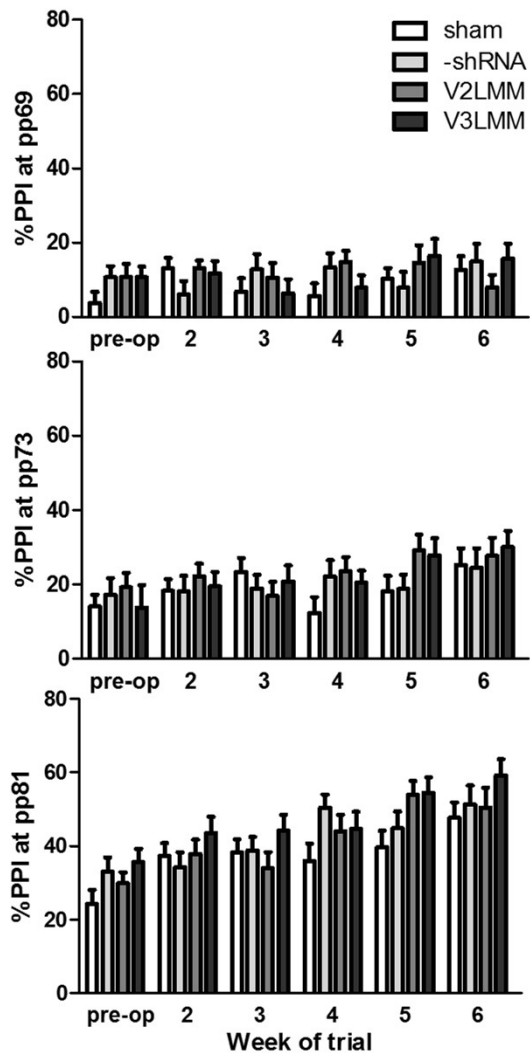

**Figure S3. Raw PPI analysis of each prepulse on %PPI.**

Two-way ANOVA for time and treatment group were run for pp69, pp73, and pp81.

Pp69 showed no significant influences of time ( $F_{5,370}=0.8552$   $p=0.5115$ ) or treatment ( $F_{3,370}=0.5859$   $p=0.6262$ ) and there was no significant interaction between the two variables ( $F_{15,370}=1.150$   $p=0.3098$ ) for this prepulse.

Pp73 showed a significant influence of time ( $F_{5,370}=4.091$   $p=0.0013$ ) but NSD for treatment or any interaction was seen, and post-hoc analysis (Bonferroni corrected) revealed no differences. Pp81 showed a significant influence of time ( $F_{5,370}=25.63$   $p<0.0001$ ) but NSD for treatment or any interaction was seen. Post-hoc analysis (Bonferroni corrected) revealed NSD for any other comparisons.

One-way ANOVA was used to analyze within group, between time points for each prepulse.

Pp69 showed NSD for any treatment group (sham:  $F_{5,108}=1.446$   $p=0.2139$ ; -shRNA:  $F_{5,84}=0.7478$   $p=0.5900$ ; V2LMM:  $F_{5,126}=0.5833$   $p=0.7172$ ; V3LMM:  $F_{5,126}=1.185$   $p=0.3206$ ).

Pp73 showed NSD for any treatment group (sham:  $F_{5,108}=1.697$   $p=0.1415$ ; -shRNA:  $F_{5,84}=0.4066$   $p=0.8429$ ; V2LMM:  $F_{5,126}=1.365$   $p=0.2420$ ; V3LMM:  $F_{5,126}=1.768$   $p=0.1240$ ).

Pp81 showed differences in all four treatment groups. Sham:  $F_{5,108}=3.409$   $p=0.0067$ , with post hoc (Tukey's HSD) showing significant difference in PPI between pre-op and week 6 ( $p<0.01$ ). -shRNA:  $F_{5,84}=3.585$   $p=0.0055$  with post hoc showing pre-op vs. week 6 ( $p<0.05$ ). V2LMM:  $F_{5,126}=4.842$   $p=0.0004$ . post hoc pre-op vs. week 5 ( $p<0.001$ ), pre-op vs. week 6 ( $p<0.05$ ), week 3 vs. week 5 ( $p<0.05$ ). V3LMM:  $F_{5,126}=3.928$   $p=0.0024$ . post hoc pre-op vs. week 5 ( $p<0.05$ ), pre-op vs. week 6 ( $p<0.001$ ).

Numbers per group: sham: 20. -shRNA: 15. V2LMM: 20. V3LMM: 22
